# Supplementary material for: Machine learning of cloud types in satellite observations and climate models
Source: Copernicus journal article supplement (doi:10.5194/acp-23-523-2023), 2023-01-13
Supplement: Supplementary file 2 [file acp-23-523-2023-supplement.zip]

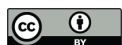

## *Supplement of*

# **Machine learning of cloud types in satellite observations and climate models**

**Peter Kuma et al.**

*Correspondence to:* Peter Kuma ([peter.kuma@misu.su.se](mailto:peter.kuma@misu.su.se))

- [acp-23-523-2023-supplement-title-page.pdf](#)
- [supplement](#)
  - [Supplement.pdf](#)
  - [geo\\_cto\\_abrupt-4xCO2\\_10\\_1.png](#)
  - [geo\\_cto\\_abrupt-4xCO2\\_10\\_2.png](#)
  - [geo\\_cto\\_abrupt-4xCO2\\_27\\_1.png](#)
  - [geo\\_cto\\_abrupt-4xCO2\\_27\\_2.png](#)
  - [geo\\_cto\\_historical\\_10\\_1.png](#)
  - [geo\\_cto\\_historical\\_10\\_2.png](#)
  - [geo\\_cto\\_historical\\_27\\_1.png](#)
  - [geo\\_cto\\_historical\\_27\\_2.png](#)
  - [geo\\_cto\\_xval\\_10.png](#)
  - [geo\\_cto\\_xval\\_27.png](#)
  - [validation\\_10.png](#)
  - [validation\\_27.png](#)

The copyright of individual parts of the supplement might differ from the article licence.
